# Supplementary material for: The non-redundant functions of PIWI family proteins in gametogenesis in golden hamsters
Source: PubMed Central journal article supplement (PMC10465502; doi:10.1038/s41467-023-40650-x), 2023-08-29
Supplement: 41467_2023_40650_MOESM2_ESM.pdf [file 41467_2023_40650_MOESM2_ESM.pdf]

## Peer Review File

---

The non-redundant functions of PIWI family proteins in gametogenesis in golden hamsters

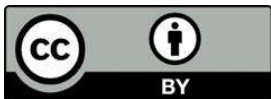

**Open Access** This file is licensed under a Creative Commons Attribution 4.0

International License, which permits use, sharing, adaptation, distribution and reproduction in any medium or format, as long as you give appropriate credit to

the original author(s) and the source, provide a link to the Creative Commons license, and indicate if changes were made. In the cases where the authors are anonymous, such as is the case for the reports of anonymous peer reviewers, author attribution should be to 'Anonymous Referee' followed by a clear attribution to the source work. The images or other third party material in this file are included in the article's Creative Commons license, unless indicated otherwise in a credit line to the material. If material is not included in the article's Creative Commons license and your intended use is not permitted by statutory regulation or exceeds the permitted use, you will need to obtain permission directly from the copyright holder. To view a copy of this license, visit <http://creativecommons.org/licenses/by/4.0/>.

## REVIEWER COMMENTS

### Reviewer #1 (Remarks to the Author):

In this beautiful manuscript, the authors describe comprehensively the piRNA pathway in golden hamsters. Using knockouts for all four PIWI proteins, they describe their distribution in different developmental stages, sub-cellular localization, phenotypes and small RNA populations. They compare their findings to the decades of information available from study of mice, the other major mammalian model in the field. Recently a couple of other publications have reported on the piRNA pathway in hamsters, but this manuscript completes this series to encapsulate everything into one manuscript.

There are several key findings that are of interest to the field. The relevance of piRNA pathway for the female germline (which is not the case in mice), compensation between PIWI proteins during transposon silencing, role of PIWIL3 (a fourth protein not found in mice), relevance of piRNA pathway for embryonic development (not seen in mice). This manuscript will be a reference for the community to access and cite. I like the presentation of the figures- very clear and self-explanatory. In fact, one can read the paper just by looking at the figures. I commend the authors for this heroic effort in putting this manuscript together.

Minor suggestions.

1. The terms pr-piRNAs and pa-piRNAs are unnecessary. Just adds to the confusion.
2. The text constantly refers to mouse models while describing the results from hamster. I think it is a bit confusing and distracting. Just describe from start to finish data from hamsters. Only in the discussion, compare the two models.
3. There are a lot of repetitions in the text due to the mouse-hamster comparison.

### Reviewer #2 (Remarks to the Author):

Review uploaded as PDF.

Manuscript No.: 405166

"The non-redundant functions of PIWI family proteins in gametogenesis in golden hamsters"

Xiaolong Lv, Wen Xiao, Yana Lai, Zhaozhen Zhang, Hongdao Zhang, Chen Qu, Li Hou, Qin Chen, Duanduan Wang, Yun Gao, Yuanyuan Song, Xinjia Shui, Qinghua Chen, Ruixin Qin, Shuang Liang, Wentao Zeng, Aimin Shi, Jianmin Li, Ligang Wu

Wu and colleagues have characterized the expression, localization, and loss-of-function phenotypes for the four PIWI proteins in male and female golden hamsters. The study design, the experiments, and results give convincing evidence of the importance of the four PIWIL proteins in gametogenesis in hamsters, but many of their conclusions go too far beyond the existing evidence. Additionally, more detail is required regarding sequencing and genetics to properly assess the study, and several key experiments are missing statistical analysis or appear to have failed to correct for multiple hypothesis testing.

Specific Concerns

- (1) How did the authors determine that PIWIL2 was present in IMC and PIWIL4 was localized to the piP-body? What markers were used to identify mitochondria and piP bodies? Please show the data that supports the colocalization of PIWIL2 and PIWIL4 with these subcellular structures in testis and of PIWIL3 with mitochondria in four-cell embryos.
- (2) For how many generations were the knockout hamsters backcrossed to eliminate off-target CRISPR edits before the heterozygotes were crossed to obtain homozygotes for phenotypic and fertility analyses?
- (3) How were small RNAs identified as piRNAs? For PIWIL1,2, or 4, which are methylated, a small RNA can be categorized as a piRNA if it is enriched in an oxidized small RNA sequencing library or co-immunoprecipitated with the PIWI protein; for PIWIL3, co-immunoprecipitation is the only way to identify piRNAs.
- (4) What supports the claim that additional 29 nt piRNAs are made in *Piwil3*<sup>-/-</sup> ovaries to compensate for loss of PIWIL3? Isn't it more likely that PIWIL3 and PIWIL1 compete for a common set of pre-piRNAs and that in the absence of PIWIL3, these are loaded into PIWIL1 and trimmed to 29 nt instead of 19 nt? Is the amount of PIWIL1 protein greater in *Piwil3*<sup>-/-</sup> than in wild-type?
- (5) The authors make two apparently contradictory claims: first, that in *Piwil1*<sup>-/-</sup> germ cells die before the pachytene stage and, second, that *Piwil1*<sup>-/-</sup> testes are enriched for spermatocytes arrested at the pachytene or diplotene stages. I don't understand how both can be true.
- (6) Given that the distribution of cell types in *Piwil1*<sup>-/-</sup> testes differs from wild-type, how can the authors be sure that the 1790 genes whose mRNA abundance increased in the mutant testes is caused by a loss of piRNA-directed regulation rather than the mismatch in tissue composition? To establish a change in mRNA

abundance caused by loss of piRNA function, purified germ cells must be compared to each other (e.g., FACS-purified primary spermatocytes from *Piwi1*<sup>-/-</sup> vs. wild-type).

(7) The specific genes and transcription factors responsible for producing pachytene piRNA precursor RNAs have been defined in mice, macaque, and humans. Do the pachytene piRNAs in hamsters come from loci syntenic to those genes? From rodent- or hamster-specific loci?

(8) The claim that in hamsters there is no clear difference between pre-pachytene and pachytene piRNAs is semantics, not biology. Operationally, male mouse germ cells make transposon-silencing piRNAs, 3'-UTR-derived piRNAs, and "pachytene" piRNAs derived from a defined set of genes whose lncRNA transcripts are depleted of active transposons. For example, in male mice, the L1 transposon is desilenced in Miwi (*Piwi1*) mutants after the onset of meiosis. But the piRNAs involved do not derive from any of the pachytene piRNA loci and are instead derived from loci containing sequences antisense to L1. Despite the awkward nomenclature, "pachytene" piRNAs are defined by their source loci not their production at the pachytene stage of meiosis. The most evolutionarily conserved (by synteny not sequence) pachytene piRNA genes are also transcribed by a common set of transcription factors, A-MYB (*MYBL1*) and *TCFL5*. Given that the pachytene piRNA genes responsible for the majority of human "pachytene" piRNAs are found at syntenic locations in humans and are also transcribed by A-MYB and *TCFL5*, it is highly unlikely that this class of piRNAs (regardless of its name) is different in hamsters. Given the recent findings by Choi et al. (*PLoS Genet* 2021) and Wu et al. (*Nat Genet* 2020) that the majority of pachytene piRNAs have no detectable function in mice, it is unlikely that the composition and functions of small RNAs obviously differ significantly among male placental mammals. Similarly, the current manuscript provides little evidence that "the smRNA composition and function in male germ cells are likely diverse in different mammals."

(9) The claim that the consequences of individual knockout of *Piwi1*, *Piwi2*, or *Piwi4* are consistently more severe in golden hamsters than in mice may simply reflect the use of one specific inbred strain (C57BL/6) for the mouse studies. This claim needs to be softened.

#### Important Data Concern

Extended Data Figure 1 appears to be a composite of multiple gels. This type of manipulation is unlikely to meet the journal standards. Please provide the uncropped gels used to assemble the figure.

#### Other Points

(1) Figure 2A provides a far better demonstration of antibody specificity than Extended Data Figure 1A. Could 2A be moved to Figure 1?

(2) In addition to reference 23, Loubalova et al. (*Nat Cell Biol* 2021) should be cited for the female subfertility of *Piwi3* mutants.

(3) Please provide the following information for the light microscopy methods:

- Objective (magnification, N.A., immersion used, correction collar yes/no);
- Filter sets and excitation sources and wavelengths; if known used power and excited field of view;
- Camera (manufacturer, model, pixel size and used settings);
- Total system magnification and sampling rate of signal.

(4) In *Piwi3* mutant oocytes, what data show a geometric increase in 29 nt piRNAs bound to *PIWIL1*? Why is the increase geometric?

(5) In Extended Data Figures 5A, 5E, and 6C were the data corrected for multiple hypothesis testing. If not, the p-values need to be adjusted to take this into account.

(6) "Crosstalk" means the "unwanted transfer of signals between communication channels." The standard term for ping-pong between different PIWI proteins is heterotypic ping-pong; ping-pong within a single type of PIWI protein is homotypic ping-pong.

(7) Pachytene piRNAs in mice have been extensively characterized in both staged whole testes (Li et al., *Mol Cell* 2013) and FACS purified cells (Gainetdinov et al., *Mol Cell* 2018; Wu et al., *Nat Genet* 2020; Yu et al., *RNA* 2023), not simply in adult total testes.

(8) The report that "spermiRs" (not a term generally used by the field) are a very high proportion of pre-meiotic small RNAs (ref. 39) is not consistent with other, more quantitative analyses of spermatogonial miRNAs and piRNAs. Unless the authors can further support these claims using publicly available sequencing data performed with small RNA spike-ins and purified spermatogonia, the claim that there is a difference between mice and hamsters should be removed from the manuscript.

(9) Extended Data Figure 3C: Why are the normalization parameters different for testes (total reads) and MII oocytes (EERC spike-ins)?

(10) Figure 2B. The *Piwi2* mutant still shows some green staining expression that is similar to wild-type. More quantitative data is needed to determine whether this is real staining or background.

(11) Figure 4A and 4B: The authors state that "Despite the absence of *PIWIL3* 19-nt piRNAs, the distribution of small RNAs in maternal *Piwi3*<sup>-/-</sup> embryos at 34 h.p.e.a. and 54 h.p.e.a. were more similar to those of WT embryos at 11 h.p.e.a. and 34 h.p.e.a., respectively." The figure does not support the statement; the length distributions of those wild-type stages do not look like those of the mutant.

**Reviewer #3 (Remarks to the Author):**

The manuscript by Lv et al. reports the characterization of all four PIWI genes and their associated piRNAs in golden hamsters with regard to their expression patterns and reproductive defects in their knockout-mutant golden hamsters. The immunofluorescence analysis of PIWIL1, 2 and 4 proteins indicated the evolutionarily conserved patterns of their expression and subcellular localization with regard to their orthologs in mice. The authors then generated *Piwil1*<sup>-/-</sup>, *Piwil2*<sup>-/-</sup>, *Piwil3*<sup>-/-</sup>, and *Piwil4*<sup>-/-</sup> golden hamsters, all of which showed normal viability without any discernible morphological or behavioral abnormalities. However, the *Piwil1*<sup>-/-</sup> mutant was complete sterility in both males and females whereas *Piwil2*<sup>-/-</sup> and *Piwil4*<sup>-/-</sup> mutants were completely male sterile but did not show deduced female sterility. By contrast, *Piwil3*<sup>-/-</sup> females displayed partial female fertility, as reported previously. Furthermore, *Piwil1*<sup>-/-</sup> and *Piwil3*<sup>-/-</sup> deficiency selectively impacted on the biogenesis of 29-nt and 19-nt piRNAs, respectively, with 29-nt piRNAs partially compensated for the loss of 19-nt piRNAs. This incomplete compensation was also reflected as maternal effect on embryogenesis, such that maternal *Piwil3*<sup>-/-</sup> embryos were delayed in development but were not arrested at 2-cell and 4-cell stages. Finally, the authors systematically characterized piRNAs associated with the four PIWI proteins in wildtype and *Piwi* mutant testes at 3dpp and adulthood, which correlated these piRNAs roles in transposon silencing and gene expression.

This is a very systematic study of the PIWI-piRNA pathway in the golden hamster, a more fitting model than mice for investigating PIWI-piRNA functions in mammals and humans. The data are of very high quality and the conclusions are conservative and well justified. Although the most of the findings are expected and short of exciting novelty, this study, nevertheless, is a tour de force with substantial investment of research effort. There are a large number of findings that collectively complete the picture of the function of PIWI-piRNA pathway in the golden hamster. This paper will be well cited by PIWI-piRNA researchers and is very suitable for publication in Nature Communications. The manuscript is also well written. I did not spot any text that need to be edited. I recommend its publication without revision.

1 **Reviewer #1** (Remarks to the Author):

2 In this beautiful manuscript, the authors describe comprehensively the piRNA pathway  
3 in golden hamsters. Using knockouts for all four PIWI proteins, they describe their  
4 distribution in different developmental stages, sub-cellular localization, phenotypes  
5 and small RNA populations. They compare their findings to the decades of information  
6 available from study of mice, the other major mammalian model in the field. Recently  
7 a couple of other publications have reported on the piRNA pathway in hamsters, but  
8 this manuscript completes this series to encapsulate everything into one manuscript.

9 There are several key findings that are of interest to the field. The relevance of  
10 piRNA pathway for the female germline (which is not the case in mice), compensation  
11 between PIWI proteins during transposon silencing, role of PIWIL3 (a fourth protein  
12 not found in mice), relevance of piRNA pathway for embryonic development (not see  
13 in mice). This manuscript will be a reference for the community to access and cite. I  
14 like the presentation of the figures- very clear and self-explanatory. In fact, one can  
15 read the paper just by looking at the figures. I commend the authors for this heroic  
16 effort in putting this manuscript together.

17 **RESPONSE:** We would like to express our sincere appreciation for the reviewer's  
18 positive feedback regarding our study. It brings us great pleasure to hear that you found  
19 our research informative and valuable to the field.

20

21 Minor suggestions.

22 1. The terms pr-piRNAs and pa-piRNAs are unnecessary. Just adds to the confusion.

23 **RESPONSE:** We thank the reviewer for the valuable suggestion. We have revised this  
24 section and removed the terms 'pr-piRNAs' and 'pa-piRNAs' to avoid any potential  
25 confusion.

26

27 2. The text constantly refers to mouse models while describing the results from hamster.  
28 I think it is a bit confusing and distracting. Just describe from start to finish data from  
29 hamsters. Only in the discussion, compare the two models.

30 **RESPONSE:** We thank the reviewer for this valuable suggestion. We have carefully

31 revised the manuscript and limited our comparison of the two models to the discussion  
32 section in the new version of the paper.

33

34 3. There are a lot of repetitions in the text due to the mouse-hamster comparison.

35 **RESPONSE:** We thank the reviewer for pointing out this issue. We have moved  
36 comparisons to the discussion section; this will hopefully reduce any tedium caused  
37 by repetition.

38

39

40 **Reviewer #2** (Remarks to the Author):

41 Review uploaded as PDF.

42 Manuscript No.: 405166

43 “The non-redundant functions of PIWI family proteins in gametogenesis in golden  
44 hamsters”

45 Xiaolong Lv, Wen Xiao, Yana Lai, Zhaozhen Zhang, Hongdao Zhang, Chen Qu, Li Hou,  
46 Qin Chen, Duanduan Wang, Yun Gao, Yuanyuan Song, Xinjia Shui, Qinghua Chen,  
47 Ruixin Qin, Shuang Liang, Wentao Zeng, Aimin Shi, Jianmin Li, Ligang Wu

48 Wu and colleagues have characterized the expression, localization, and loss-of-  
49 function phenotypes for the four PIWI proteins in male and female golden hamsters.

50 The study design, the experiments, and results give convincing evidence of the  
51 importance of the four PIWI proteins in gametogenesis in hamsters, but many of their  
52 conclusions go too far beyond the existing evidence. Additionally, more detail is  
53 required regarding sequencing and genetics to properly assess the study, and several  
54 key experiments are missing statistical analysis or appear to have failed to correct for  
55 multiple hypothesis testing.

56 **RESPONSE:** We would like to express our sincere gratitude to the reviewer for their  
57 valuable and insightful comments. To address their concerns, we have conducted  
58 additional experiments and provide more thorough analyses according to their  
59 suggestions in the new version of the study. Furthermore, we have revised the text of  
60 original manuscript based on their comments.

61

62 **Specific Concerns**

63 (1) How did the authors determine that PIWIL2 was present in IMC and PIWIL4 was  
64 localized to the piP-body? What markers were used to identify mitochondria and piP  
65 bodies? Please show the data that supports the colocalization of PIWIL2 and PIWIL4  
66 with these subcellular structures in testis and of PIWIL3 with mitochondria in four-cell  
67 embryos.

68 **RESPONSE:** As recommended, we have conducted new experiments and provide  
69 evidence supporting the colocalization of PIWIs in the subcellular structures.  
70 Specifically, we used protein markers including DCP1a and DDX6/p54 to detect piP  
71 bodies in testes; TDRD1 and ATP5A to identify IMC in testes; and ATP5A to observe  
72 mitochondria in four-cell embryos, as performed in previous studies (Ge et al., 2019,  
73 *Mol Cell*; Hoop et al., 2021, *Mol Cell*). Our results show that PIWIL2 colocalizes with  
74 DCP1A, TDRD1, and ATP5A in prospermatogonia, thus providing evidence of its  
75 presence in piP bodies and IMC (Fig. s1B, s1E, and s1F). And PIWIL4 colocalize with  
76 DCP1A and DDX6 in prospermatogonia, supporting its presence in piP bodies (Fig.  
77 s1C and s1D). Furthermore, we found that PIWIL3 colocalizes with ATP5A in four-cell  
78 embryos, indicating it can associate with mitochondria (Fig. s2G and s2H).

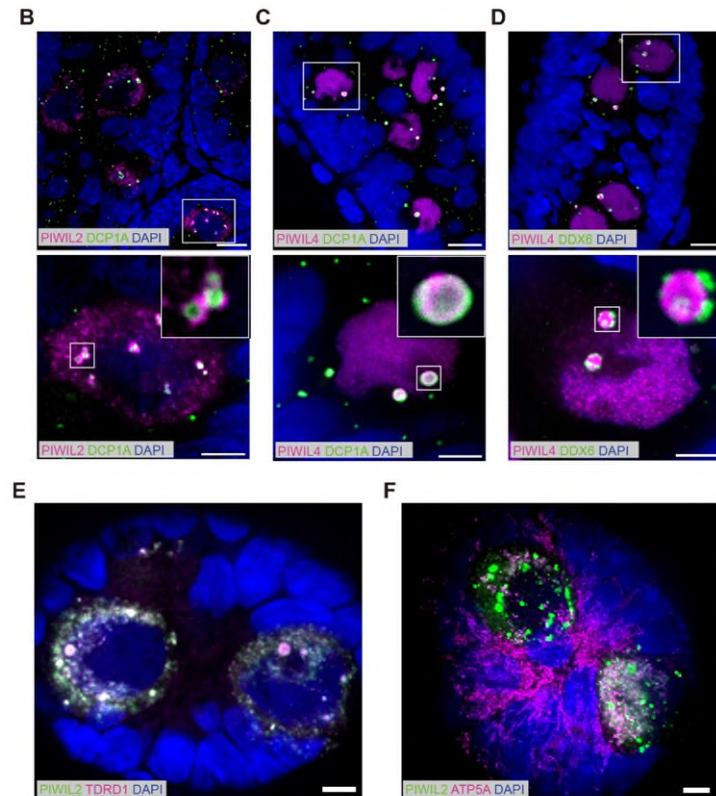

79

80 **Fig. s1 Expression and localization of PIWIs in male germ cells**

81 **(B-D)** Immunofluorescence staining of postnatal testes with anti-PIWIL2 and anti-DCP1A **(B)**,  
 82 anti-PIWIL4 and anti-DCP1A **(C)**, or anti-PIWIL4 and anti-DDX6 **(D)** antibodies, respectively.  
 83 Scale bar = 10 μm (top); Scale bar = 4 μm (bottom).

84 **(E-F)** Immunofluorescence staining of postnatal testes with anti-PIWIL2 and anti-TDRD1 **(E)** or  
 85 anti-ATP5A **(F)** antibodies. Scale bar = 4 μm.

86

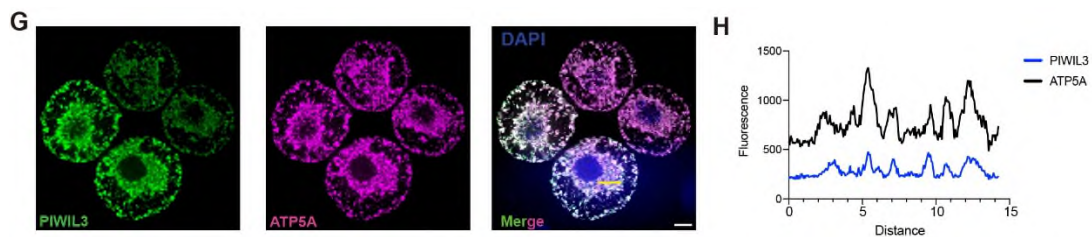

87

88 **Fig. s2 Expression and localization of PIWIs in female germ cells**

89 **(G)** Immunofluorescence staining of four-cell embryos with anti-PIWIL3 and anti-ATP5A  
 90 antibodies to determine their colocalization. Scale bar, 4 μm.

91 **(H)** Fluorescence intensity profiles of PIWIL3 and ATP5A. Overlapping peaks indicate  
 92 colocalization.



93

94 These new results are included in revised Fig. s1 and Fig. s2 and reported in the  
95 corresponding Results section in the revised manuscript.

96

97 **(2)** For how many generations were the knockout hamsters backcrossed to eliminate  
98 off-target CRISPR edits before the heterozygotes were crossed to obtain homozygotes  
99 c?

100 **RESPONSE:** We thank the reviewer for highlighting this crucial but unintentionally  
101 omitted information. To ensure the validity and reliability of our findings, all four Piwi  
102 knockout hamsters were backcrossed for a minimum of nine generations before  
103 crossing heterozygotes to obtain homozygotes. This information has been added to  
104 the "Generation of Piwi mutant hamsters" subsection of the Methods in the following  
105 statement: "All four Piwi mutant hamsters were backcrossed for a minimum of nine  
106 generations before crossing heterozygotes to obtain homozygotes".

107

108 **(3)** How were small RNAs identified as piRNAs? For PIWIL1, 2, or 4, which are  
109 methylated, a small RNA can be categorized as a piRNA if it is enriched in an oxidized  
110 small RNA sequencing library or co-immunoprecipitated with the PIWI protein; for  
111 PIWIL3, co-immunoprecipitation is the only way to identify piRNAs.

112 **RESPONSE:** We appreciate the reviewer's insightful question, and we agree that co-  
113 immunoprecipitation (IP) or oxidization data are critical for identifying PIWI-specific  
114 piRNAs

115 In our previous research (Zhang et al. 2021, *Nature cell biology*), we conducted  
116 PIWIL1 and PIWIL3 IP and oxidation assays in wild-type and Piwil1 mutant oocytes or  
117 testes (see Response Fig. 1, which is modified from Fig. 5b and 5c, Extended Data  
118 Fig. 5f and 5g in the previous paper). These assays revealed the presence of three  
119 groups of piRNAs in MII oocytes, including 23-nt and 29-30-nt oxidation resistant  
120 piRNAs associated with PIWIL1 and 19-nt oxidation sensitive piRNAs associated with  
121 PIWIL3.

122 In the current study, we conducted co-immunoprecipitation experiments with

123 antibodies specifically targeting PIWIL1, PIWIL2, or PIWIL4 in 3 d.p.p. or adult testes  
 124 with small-RNA sequencing (see Fig. s10A, s10B, s11A, and s11E of the submitted  
 125 manuscript). Our findings demonstrate that PIWIL2 binds piRNAs that peak at 27-nt in  
 126 both adult and 3 d.p.p. testes, whereas PIWIL4 binds piRNAs that peak at 28-nt only  
 127 in 3 d.p.p. testes and PIWIL1 binds piRNAs that peak at 29-30-nt only in adult testes.

128 In summary, we did use Co-IP with PIWIL1, PIWIL2, PIWIL3, and PIWIL4 to  
 129 identify their specific, bound piRNAs, and also used oxidation to identify PIWIL1-  
 130 piRNAs.

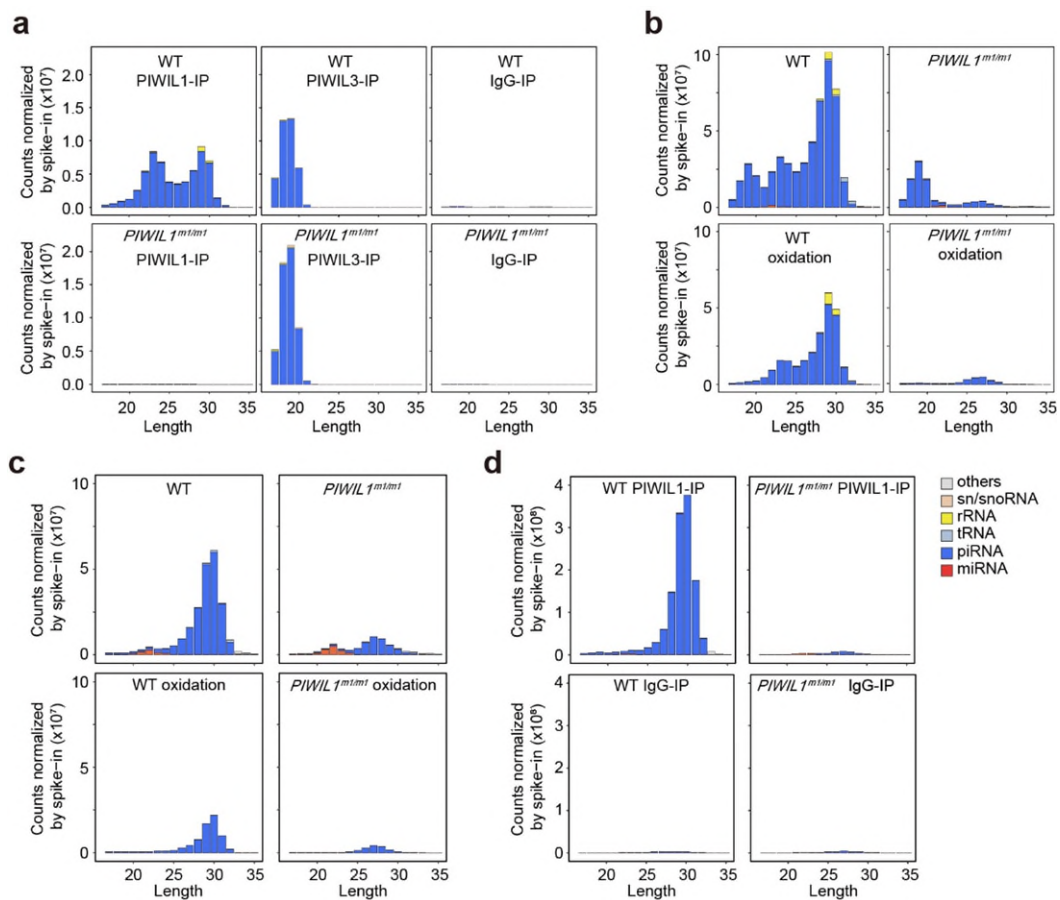

131

132 **Response Fig. 1 Identification of PIWIL1- and PIWIL3-piRNAs**

133 **(a)** The size distribution of PIWIL1- or PIWIL3-bound piRNAs identified by immunoprecipitation  
 134 using anti-PIWIL1 or anti-PIWIL3 antibodies in WT and *Piwil1<sup>m1/m1</sup>* MII oocytes, respectively.  
 135 Rabbit non-specific immunoglobulin G (IgG) antibodies were used as a negative control. Two  
 136 populations of piRNAs—22–24 nucleotides and 28–30 nucleotides—bound to PIWIL1; and 18–  
 137 20-nucleotide piRNAs bound to PIWIL3. **(b)** The composition of small RNAs in WT and  
 138 *Piwil1<sup>m1/m1</sup>* MII oocytes with or without NaIO<sub>4</sub> treatment. **(c)** Composition of small RNAs in wild-

139 type and *Piwil1*<sup>m1/m1</sup> testes with or without NaIO<sub>4</sub> oxidation treatment. The small RNA counts  
140 were normalized by exogenous spike-in. **(d)** Size distribution of PIWIL1-bound piRNAs in wild-  
141 type and *Piwil1*<sup>m1/m1</sup> testes immunoprecipitated with PIWIL1-specific antibody. Rabbit non-  
142 specific immunoglobulin G (IgG) served as a negative control. The small RNA counts were  
143 normalized by exogenous spike-in.

144

145 **(4)** What supports the claim that additional 29 nt piRNAs are made in *Piwil3*<sup>-/-</sup> ovaries  
146 to compensate for loss of PIWIL3? Isn't it more likely that PIWIL3 and PIWIL1 compete  
147 for a common set of pre-piRNAs and that in the absence of PIWIL3, these are loaded  
148 into PIWIL1 and trimmed to 29 nt instead of 19 nt? Is the amount of PIWIL1 protein  
149 greater in *Piwil3*<sup>-/-</sup> than in wild-type?

150 **RESPONSE:** We sincerely appreciate this valuable suggestion from the reviewer and  
151 apologize for any confusion caused by our explanation of the data. We intended to  
152 convey that the increased levels of PIWIL1 29-nt piRNAs could functionally  
153 compensate for the loss of PIWIL3-associated 19-nt piRNAs, not to suggest that  
154 additional 29-nt piRNAs were produced through an unknown mechanism to  
155 compensate for the loss of PIWIL3 production. We agree that PIWIL3 and PIWIL1  
156 compete for a shared pool of pre-piRNAs, which aligns with our previous findings that  
157 showed more than 70% of PIWIL3 piRNAs share identical 5' ends with PIWIL1 piRNAs.  
158 Additionally, we concur that, in the absence of PIWIL3, PIWIL1 is loaded with and  
159 processes more pre-piRNAs, leading to an increase in PIWIL1-piRNAs (Fig. 3A). As a  
160 result, the increased levels of some PIWIL1 29-nt piRNAs might at least partially  
161 compensate for the loss of PIWIL3 19-nt piRNA function in TE-repression, resulting in  
162 the observed lack of change in TE expression due to PIWIL3 knockout (Fig. s5A).

163 As suggested, we have compared PIWIL1 protein expression levels in *Piwil3*  
164 mutant oocytes with that of PIWIL3 levels in *Piwil1* mutant oocytes (Fig. s4E and s4F).  
165 The results show that PIWIL3 protein levels are significantly decreased in the absence  
166 of *Piwil1*, while PIWIL1 expression shows a non-significant, increasing trend in *Piwil3*  
167 mutant oocytes. Thus, in the absence of PIWIL3, more pre-piRNAs are loaded in the  
168 abundant PIWIL1 and trimmed to 29-nt instead of 19-nt. By contrast in *Piwil1* mutant

169 oocytes, impaired PIWIL3 expression results in lower efficiency processing of the  
170 larger pool of pre-piRNAs, and consequently leading to almost unchanged expression  
171 levels of 19-nt piRNAs (Fig. 3A).

172 To improve the clarity of our explanation of these data in the revised manuscript,  
173 we have removed the sentence "suggesting widely compensatory production of 29-nt  
174 piRNAs", and replaced "compensatory production of PIWIL1 29-nt piRNAs" with  
175 "increased production of PIWIL1 29-nt piRNAs" (Line 220). We have also added  
176 PIWIL1 and PIWIL3 protein expression data from WT and mutant oocytes. These new  
177 results are shown in Fig. s4 of the revised manuscript and the text has been modified  
178 accordingly (Line 202-213).

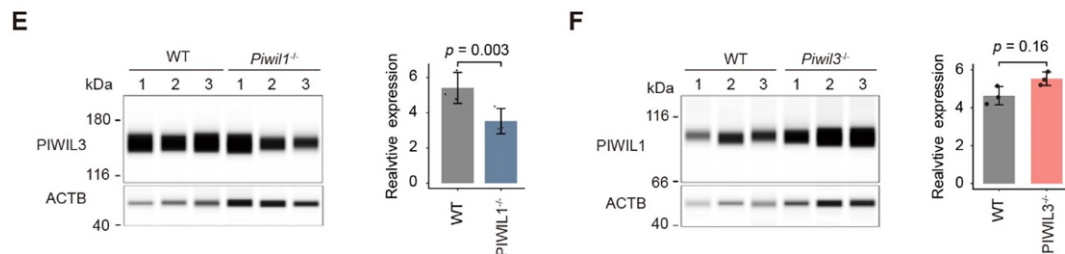

179

180 **Fig. s4 Female fertility phenotypes of *Piwi*-deficient golden hamsters**

181 **(E-F)** PIWIL3 protein levels in WT and *Piwil1*<sup>-/-</sup> MII oocytes **(E)** and PIWIL1 levels in WT and  
182 *Piwil3*<sup>-/-</sup> mutant MII oocytes **(F)**. 17-20 oocytes from 4–6-month-old hamsters were collected  
183 and lysed for protein analysis. Three biological replicates of oocytes were collected from each  
184 of three WT, *Piwil1*<sup>-/-</sup>, or *Piwil3*<sup>-/-</sup> hamsters (n=2.7-3.3 oocytes/genotype). Signal intensity (area)  
185 shows PIWIL1 or PIWIL3 protein accumulation detected by capillary electrophoresis Western  
186 Blot assays. Significance was determined by unpaired two-tailed *t*-test. Data represent mean  $\pm$   
187 s.e.m.

188

189 **(5)** The authors make two apparently contradictory claims: first, that in *Piwil1*<sup>-/-</sup> germ  
190 cells die before the pachytene stage and, second, that *Piwil1*<sup>-/-</sup> testes are enriched  
191 for spermatocytes arrested at the pachytene or diplotene stages. I don't understand  
192 how both can be true.

193 **RESPONSE:** We are grateful to the reviewer for bringing point to our attention. In this  
194 study, we quantified WT and *Piwil1* mutant spermatocytes by FACS using

195 Hoechst33342 and PI staining. Our analysis revealed that ~26% of the total  
196 spermatocytes in *Piwil1* mutant testes were PI-positive, with the majority of these PI-  
197 positive spermatocytes in the zygotene or pachytene stages (Fig. s9B). These results  
198 suggest that a substantial proportion of spermatocytes die before reaching the  
199 pachytene stage, while a significant proportion of them can survive and develop to the  
200 pachytene or diplotene stage. However, these surviving pachytene or diplotene  
201 spermatocytes are abnormal and exhibit anomalous staining of lectin peanut agglutinin  
202 (PNA) around their nuclei, which we reported in our previous study (Zhang et al., 2021,  
203 *Nat Cell Biol*). Moreover, few of these cells progress to the next stage and they  
204 eventually detach from the tubules, flow into the cauda epididymis, and undergo cell  
205 death (Fig. s9G).

206 To more clearly describe these observations, we have added the following  
207 sentence to our results: "Although a significant proportion can survive to reach the  
208 pachytene or diplotene stage, these spermatocytes were abnormal and few  
209 progressed to the next stage; instead, they eventually detached from the tubules,  
210 flowed into the cauda epididymis, and underwent cell death (Fig. s9G)." (Line 332-336).

211

212 **(6)** Given that the distribution of cell types in *Piwil1*<sup>-/-</sup> testes differs from wild-type,  
213 how can the authors be sure that the 1790 genes whose mRNA abundance increased  
214 in the mutant testes is caused by a loss of piRNA-directed regulation rather than the  
215 mismatch in tissue composition? To establish a change in mRNA abundance caused  
216 by loss of piRNA function, purified germ cells must be compared to each other (e.g.,  
217 FACS-purified primary spermatocytes from *Piwil1*<sup>-/-</sup> vs. wild-type).

218 **RESPONSE:** We appreciate this valuable suggestion from the reviewer. As suggested,  
219 we have purified pre-leptotene, leptotene/zygotene, pachytene, and diplotene  
220 spermatocytes from WT and *Piwil1* mutant testes and conducted RNAseq to compare  
221 transcriptomes at the same stage. Our results indicate that 4, 16, 32, and 115 genes  
222 are dysregulated in the pre-leptotene, leptotene/zygotene, pachytene, and diplotene  
223 *Piwil1* mutant spermatocytes, respectively (Fig. 6E). However, the number of  
224 dysregulated TEs was negligible, suggesting that PIWIL1 primarily participates in gene

225 regulation rather than TE silencing.

226 Gene ontology (GO) analysis revealed that these differentially expressed genes  
227 (DEGs) were enriched in functions related to “sperm motility” and “spermatid  
228 development” (Fig. s12A), suggesting important roles in spermatocyte development  
229 and maturation. These findings highlight the crucial transcriptional regulatory role of  
230 PIWIL1 in spermatogenesis, even in leptotene and zygotene spermatocytes.

231 These new results are shown in new Fig. 6E and Fig. s12 of the revised  
232 manuscript and the text has been modified accordingly (Line 391-404).

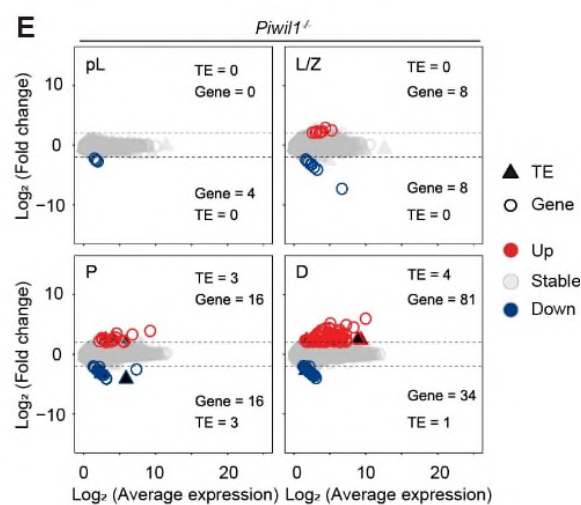

233

234 **Fig. 6 Impaired TE silencing or gene expression in *Piwi*-deficient spermatogenic cells**

235 **(E)** Analysis of differentially expressed consensus TEs and genes in purified pre-leptotene,  
236 leptotene/zygotene, pachytene, and diplotene spermatocytes of WT and *Piwil1*<sup>-/-</sup> testes.  
237 TE/gene transcription levels were normalized to exogenous ERCC (External RNA Control  
238 Consortium) RNA spike-in. Significantly up- or down-regulated TEs/genes ( $\geq$  four-fold; FDR <  
239 0.01, permutation test) are indicated in red or blue, respectively. TEs and genes are indicated  
240 by different shapes with TE or gene number shown at the top. Data are means of three or four  
241 biological replicates.

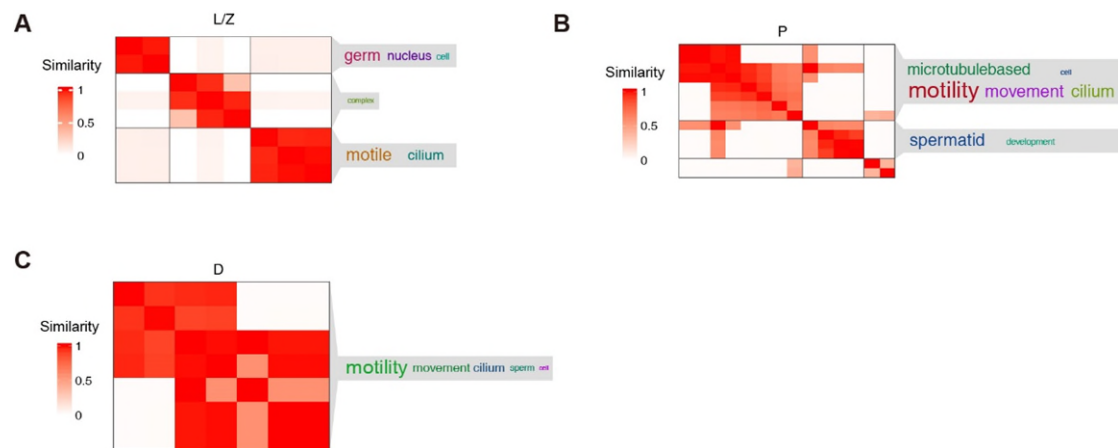

242

243 **Fig. s12 Gene ontology (GO) analysis of DEGs in *Piwil1*<sup>-/-</sup> spermatocytes**

244 **(A-C)** Top-ranking GO terms (biological processes) of differentially expressed genes in *Piwil1*-  
 245 deficient leptotene/zygotene **(A)**, pachytene **(B)**, or diplotene **(C)** spermatocytes.

246

247 **(7)** The specific genes and transcription factors responsible for producing pachytene  
 248 piRNA precursor RNAs have been defined in mice, macaque, and humans. Do the  
 249 pachytene piRNAs in hamsters come from loci syntenic to those genes? From rodent-  
 250 or hamster-specific loci?

251 **RESPONSE:** We thank the reviewer for this thoughtful question. We address this  
 252 concern along with our response to questions 8, below.

253

254 **(8)** The claim that in hamsters there is no clear difference between pre-pachytene and  
 255 pachytene piRNAs is semantics, not biology. Operationally, male mouse germ cells  
 256 make transposon-silencing piRNAs, 3'-UTR-derived piRNAs, and "pachytene" piRNAs  
 257 derived from a defined set of genes whose lncRNA transcripts are depleted of active  
 258 transposons. For example, in male mice, the L1 transposon is desilenced in Miwi  
 259 (*Piwil1*) mutants after the onset of meiosis. But the piRNAs involved do not derive from  
 260 any of the pachytene piRNA loci and are instead derived from loci containing  
 261 sequences antisense to L1. Despite the awkward nomenclature, "pachytene" piRNAs  
 262 are defined by their source loci not their production at the pachytene stage of meiosis.  
 263 The most evolutionarily conserved (by syteny not sequence) pachytene piRNA genes  
 264 are also transcribed by a common set of transcription factors, A-MYB (MYBL1) and

265 TCFL5. Given that the pachytene piRNA genes responsible for the majority of human  
266 “pachytene” piRNAs are found at syntenic locations in humans and are also  
267 transcribed by A-MYB and TCFL5, it is highly unlikely that this class of piRNAs  
268 (regardless of its name) is different in hamsters. Given the recent findings by Choi et  
269 al. (PLoS Genet 2021) and Wu et al. (Nat Genet 2020) that the majority of pachytene  
270 piRNAs have no detectable function in mice, it is unlikely that the composition and  
271 functions of small RNAs obviously differ significantly among male placental mammals.  
272 Similarly, the current manuscript provides little evidence that “the smRNA composition  
273 and function in male germ cells are likely diverse in different mammals.”

274 **RESPONSE:** We sincerely thank the reviewer for helping to improve both our  
275 understanding and our definition of so-called pachytene piRNAs. As the reviewer  
276 suggested, we have identified the genomic loci responsible for generating pachytene  
277 piRNA precursor RNAs using a previously described method (Özata et al., 2020,  
278 *Nature Ecology&Evolution*). Briefly, we compared the abundance of piRNAs from same  
279 genomic loci in 3 d.p.p. testes and adult testes. This analysis identified 97 loci  
280 responsible for producing piRNAs with  $\geq 4$ -fold higher abundance in adult testes  
281 compared to 3 d.p.p. testes, and were thus designated as pachytene piRNA loci (Fig.  
282 7A). We then investigated whether these loci that produce pachytene piRNAs in golden  
283 hamsters were syntenic with piRNA loci defined in mice and humans. Our results  
284 indicate that ~58.8% (57/97) of pachytene piRNA-producing genes in the golden  
285 hamster genome are found at syntenic locations in the mouse genome and ~24.7%  
286 (24/97) are syntenic with corresponding piRNA loci in the human genome (Fig. 7A).  
287 Approximately 38.1% (37/97) of them are from rodent-specific loci, and another ~33.0%  
288 (32/97) are derived from golden hamster-specific loci. These findings suggest that a  
289 substantial proportion of pachytene piRNA genes are syntenically conserved between  
290 golden hamsters and other mammals.

291 As the reviewer mentioned, the most evolutionarily conserved pachytene piRNA  
292 genes are often transcribed by a common set of transcription factors, A-MYB (MYBL1)  
293 and TCFL5 (Li et al., 2013 Mol Cell; Yu et al., RNA, 2022). Intriguingly, we identified a  
294 conserved A-MYB-binding motif in the promoter regions of the golden hamster



295 pachytene piRNA genes (Fig. 7B). These results support that the production of  
 296 pachytene piRNA precursor RNAs is likely controlled by a specific set of transcription  
 297 factors in golden hamster, which is consistent with reports in mice, macaques, and  
 298 humans.

299 Next, we analyzed the expression patterns of pachytene piRNAs derived from the  
 300 loci identified above in smRNAseq data from several developmental stages, which  
 301 revealed that pachytene piRNAs were generated throughout the meiotic stage in  
 302 golden hamsters (Fig. 7C). These findings sharply contrasted with the well-defined set  
 303 of pachytene piRNAs produced in spermatocytes after entering the pachytene stage  
 304 of meiosis in mice. These observations suggest that regulatory functions of pachytene  
 305 piRNAs may initiate earlier in golden hamsters than those in mice, which is consistent  
 306 with the phenotypic differences observed between *Piwil1*-deficient mice and *Piwil1*-  
 307 deficient golden hamsters.

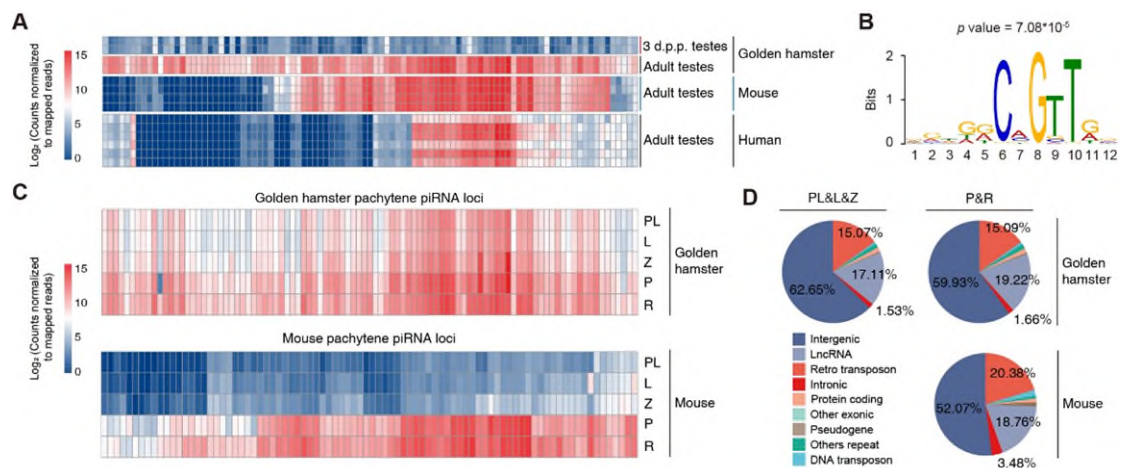

308  
 309 **Fig. 7 Comparison of testicular pachytene piRNAs between golden hamsters and mice**  
 310 **(A)** Heatmap of piRNA abundance for the golden hamster pachytene piRNA loci and the  
 311 syntenic loci reported in mouse and human.  
 312 **(B)** MEME identification of an A-MYB binding motif in the promoter regions of pachytene piRNA  
 313 loci of golden hamsters.  
 314 **(C)** Heatmap of piRNA abundance in the testes of golden hamster and mouse testes across  
 315 developmental stages. In golden hamster, the 97 pachytene piRNA loci identified above are  
 316 used with a corresponding set of well-defined pachytene piRNA loci from mice (Yu et al., 2021,  
 317 *Nat Comm*). PL, pre-leptotene; L, leptotene; Z, zygotene; P, pachytene; RS, round sperm.

318 (D) Pie charts illustrating the genomic structural annotation of loci responsible for pachytene  
319 piRNAs in mouse and golden hamster male germ cells, including intergenic, intronic, other  
320 exonic, lncRNA, pseudogene, protein-coding, other repeats, DNA transposon, and retro  
321 transposon regions.

322

323 Based on this analysis, we agree with the reviewer's assertion that pachytene  
324 piRNAs in golden hamsters are similar to those in mice and humans. These piRNA  
325 genes are primarily located in syntenically conserved regions and transcribed by a  
326 common transcription factor. We also agree that the composition and function of small  
327 RNAs in males are unlikely to differ significantly among placental mammals. We have  
328 accordingly revised our manuscript to incorporate these points (Line 470-481).  
329 However, we also observed that pachytene piRNA expression begins earlier in golden  
330 hamsters than in mice, which may explain the greater severity of defects in  
331 spermatogenesis in *Piwil1*<sup>-/-</sup> golden hamsters. We have thus updated the Abstract to  
332 more accurately reflect our conclusions, deleting the sentence "Notably, unlike mice,  
333 none of the differences were found between piRNAs generated in pr-pachytene stage  
334 and pachytene stage in golden hamsters". Moreover, we acknowledge the reviewer's  
335 concerns regarding our previous statement that small RNA composition and function  
336 in male germ cells varies significantly among mammalian species. We agree that our  
337 evidence is insufficient to support this claim; we have rephrased the relevant text in the  
338 Discussion section to present more accurate and defensible conclusions (Line 470-  
339 493).

340

341 (9) The claim that the consequences of individual knockout of *Piwil1*, *Piwil2*, or *Piwil4*  
342 are consistently more severe in golden hamsters than in mice may simply reflect the  
343 use of one specific inbred strain (C57BL/6) for the mouse studies. This claim needs to  
344 be softened.

345 **RESPONSE:** We thank the reviewer for bringing this point to our attention. We have  
346 revised the sentence in question, which now reads as follows: "In particular, individual  
347 knockout of *Piwil1*, *Piwil2*, or *Piwil4* leads to consistently more severe consequences

348 in golden hamsters than those observed in the C57BL/6 mouse model commonly used  
349 in piRNA studies.” (Line 483-485).

350

351 **Important Data Concern**

352 Extended Data Figure 1 appears to be a composite of **multiple gels**. This type of  
353 manipulation is unlikely to meet the journal standards. Please provide the uncropped  
354 gels used to assemble the figure.

355 **RESPONSE:** We are grateful to the reviewer for bringing this matter to our attention.  
356 As suggested, we now provide the uncropped gels in Source Data and we have  
357 updated Fig. s1.

358

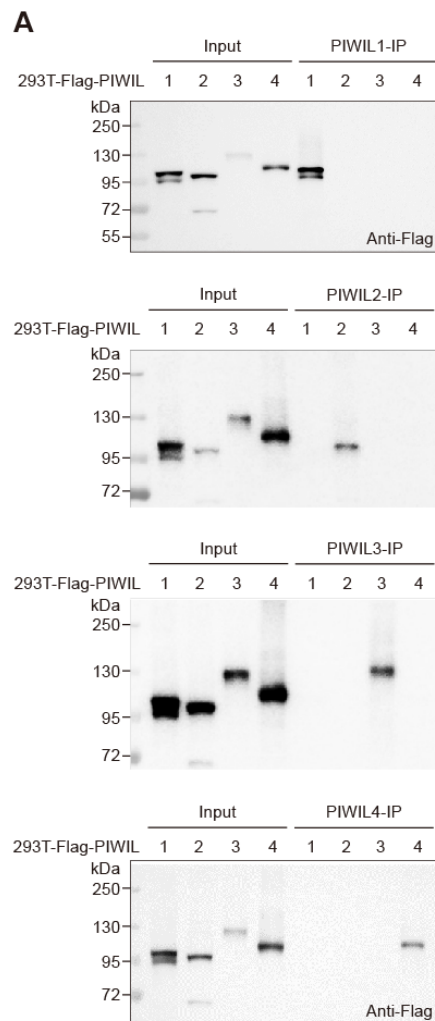

359

360 **Fig. s1 Expression and localization of PIWIs in male germ cells**

361 **(A)** Verification of antibody specificity for detection of PIWIL1, PIWIL2, PIWIL3, and PIWIL4 in  
362 golden hamsters. Flag-tagged PIWIL1, PIWIL2, PIWIL3, and PIWIL4 were overexpressed in  
363 293T cells, then immunoprecipitated using anti-PIWIL1, anti-PIWIL2, anti-PIWIL3, or anti-  
364 PIWIL4 antibodies, respectively. Detection of the immunoprecipitated products using anti-Flag  
365 antibody confirmed the specificity of anti-PIWI antibodies for their respective targets.

366

### 367 **Other Points**

368 **(1)** Figure 2A provides a far better demonstration of antibody specificity than Extended  
369 Data Figure 1A. Could 2A be moved to Figure 1?

370 **RESPONSE:** We sincerely appreciate the valuable suggestion and fully acknowledge  
371 that using mutant samples can provide a better demonstration of antibody specificity.  
372 However, the *Piwi* mutants have not yet been introduced at this point in the manuscript,  
373 and the rearrangement will thus introduce some logical problems with our study  
374 narrative that are not easily rectified. Therefore, we respectfully maintain that these  
375 antibodies will remain in Fig. 2A, and hopefully the reviewer will find that revised figure  
376 S1A satisfies their concerns.

377

378 **(2)** In addition to reference 23, Loubalova et al. (Nat Cell Biol 2021) should be cited for  
379 the female subfertility of *Piwil3* mutants.

380 **RESPONSE:** We thank the reviewer for pointing out this unintended oversight on our  
381 part. This reference regarding the female subfertility of *Piwil3* mutants by Loubalova *et*  
382 *al.* (Nat Cell Biol., 2021) is cited in the revised manuscript.

383

384 **(3)** Please provide the following information for the light microscopy methods:

- 385 • Objective (magnification, N.A., immersion used, correction collar yes/no);
- 386 • Filter sets and excitation sources and wavelengths; if known used power and excited  
387 field of view;
- 388 • Camera (manufacturer, model, pixel size and used settings);
- 389 • Total system magnification and sampling rate of signal.

390 **RESPONSE:** We greatly appreciate the reviewer's attention to detail. We have

391 incorporated the recommended information regarding the light microscopy methods  
392 into the Methods section.

393

394 **(4)** In Piwil3 mutant oocytes, what data show a geometric increase in 29 nt piRNAs  
395 bound to PIWIL1? Why is the increase geometric?

396 **RESPONSE:** We are grateful to the reviewer for pointing out this poor choice of  
397 wording. “Geometrically” has been replaced with “Obviously”.

398

399 (5) In Extended Data Figures 5A, 5E, and 6C were the data corrected for multiple  
400 hypothesis testing. If not, the p-values need to be adjusted to take this into account.

401 **RESPONSE:** We sincerely appreciate the reviewer’s comment and we acknowledge  
402 the importance of adjusting for multiple comparisons to mitigate the risk of type I error.  
403 To address this concern, we have revised our analytical method for identifying  
404 differentially expressed genes (DEGs) throughout the revised manuscript. We have  
405 now performed differential expression analysis using a permutation test with the  
406 Benjamini-Hochberg method for  $p$  value correction. Additionally, to reduce the  
407 likelihood of false positives, we also adjusted the threshold for defining DEGs to a |fold  
408 change|  $\geq 4$  and a  $p_{adj}$  value of  $< 0.01$ . The details of our analytical approach have been  
409 added to the Methods section of the revised manuscript. We have also updated the  
410 images of Fig. 6B, Fig. 6E, Fig. 6F, and Fig. s5A accordingly.

411

412 **(6)** “Crosstalk” means the “unwanted transfer of signals between communication  
413 channels.” The standard term for ping-pong between different PIWI proteins is  
414 heterotypic ping-pong; ping-pong within a single type of PIWI protein is homotypic ping-  
415 pong.

416 **RESPONSE:** We sincerely thank the reviewer for their advice. We have rectified this  
417 incorrect language where necessary throughout the revised manuscript.

418

419 **(7)** Pachytene piRNAs in mice have been extensively characterized in both staged  
420 whole testes (Li et al., Mol Cell 2013) and FACS purified cells (Gainetdinov et al., Mol

421 Cell 2018; Wu et al., Nat Genet 2020; Yu et al., RNA 2023), not simply in adult total  
422 testes.

423 **RESPONSE:** We again thank the reviewer for their insight. As recommended, we  
424 carefully reviewed the studies, obtained the sequencing data from public repositories  
425 and conducted our own comprehensive analysis. Some of the results have been  
426 incorporated into the revised manuscript, such as the synteny analysis among  
427 pachytene piRNA loci and identification of the conserved transcription factor  
428 responsible for producing pachytene piRNA precursor RNAs (Fig. 7), as discussed at  
429 length above. Unfortunately, these available datasets only include FACS purified  
430 pachytene and diplotene spermatocytes, and do not encompass FACS purified pre-  
431 leptotene, leptotene, and zygotene spermatocytes. Therefore, these datasets cannot  
432 be utilized for comparing the production of pachytene piRNAs in mice and golden  
433 hamsters pre-pachytene spermatocytes.

434

435 **(8)** The report that “spermiRs” (not a term generally used by the field) are a very high  
436 proportion of pre-meiotic small RNAs (ref. 39) is not consistent with other, more  
437 quantitative analyses of spermatogonial miRNAs and piRNAs. Unless the authors can  
438 further support these claims using publicly available sequencing data performed with  
439 small RNA spike-ins and purified spermatogonia, the claim that there is a difference  
440 between mice and hamsters should be removed from the manuscript.

441 **RESPONSE:** We thank the reviewer for raising this question. We analyzed the small  
442 RNA sequencing data (Gainetdinov et al., Mol Cell, 2018) of spermatogonia and  
443 compared the results with that of spermatogonial stem cells (SSCs) in reference 39  
444 (Zhang et al., 2019, MBE). Our analysis revealed a non-trivial discrepancy in the ratio  
445 of miRNAs to piRNAs between these two datasets (Response Fig. 2). This difference  
446 might be attributable to several factors. First, spermatogonia include a broad range of  
447 cells, each of which can also include a variety of subtypes, whereas SSCs are a  
448 specific subtype of spermatogonia that display a unique capacity for self-renewal and  
449 differentiation into specialized cell lineages. Second, the purity of sorted cells can  
450 influence the ratio of miRNAs. For instance, a dispute persists regarding which cell

451 type, germ cells or Sertoli cells, expresses high levels of "Fragile-X miRNAs" (Fx-mir;  
 452 also called miR-506 family, spermiR, or XmiR) (Ota et al., PLoS One, 2019; Zhang et  
 453 al., Mol Biol Evol, 2019; Ramaiah et al., EMBO Rep, 2020; Wang et al., EMBO Rep).  
 454 Finally, differences among library preparation methods for small RNA sequencing can  
 455 also impact the miRNA to piRNA ratio. Sequence-fixed 5' or 3' adaptors can introduce  
 456 ligation bias that may affect measurements of absolute abundance for different small  
 457 RNAs (Giraldez et al., Nature Biotechnol, 2018). We noticed that a 3-N adaptor was  
 458 used in Gainetdinov 's study, which might eliminate this effect.

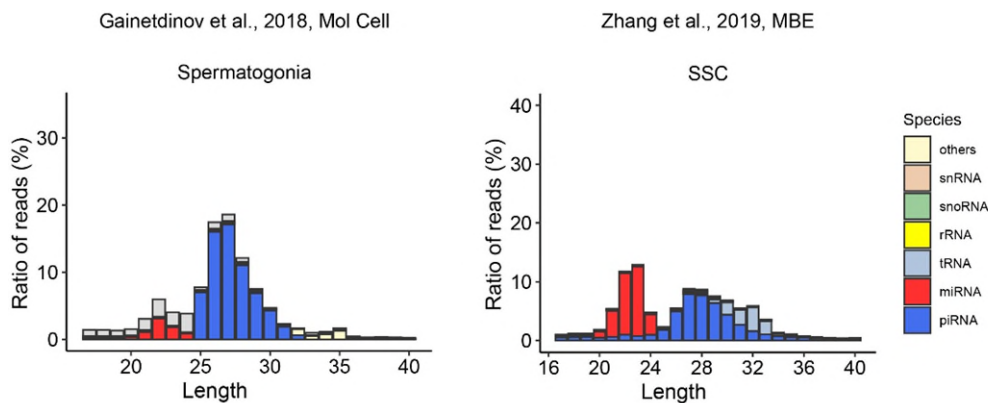

459

460 **Response Fig. 2 Length distribution of small RNAs in spermatogonia or SSCs**

461 The small RNA counts were normalized to total mapped reads.

462

463 In our current study, we found that miRNAs are highly expressed in pre-pachytene  
 464 mouse spermatocytes (~36-57% of total small RNAs), while miRNA expression is  
 465 maintained at low levels in golden hamsters (<10%). As suggested by the reviewer, we  
 466 searched almost every public resource to find available sequencing data generated  
 467 with small RNA spike-ins and purified leptotene or zygotene spermatocytes.  
 468 Unfortunately, these efforts were unsuccessful. In light of this absence of evidence, we  
 469 have decided to remove this claim from the revised manuscript in order to ensure the  
 470 rigor of our conclusions.

471

472 **(9) Extended Data Figure 3C: Why are the normalization parameters different for testes**  
 473 **(total reads) and MII oocytes (EERC spike-ins)?**

474 **RESPONSE:** We thank the reviewer for bring this to our attention. We performed

475 RNAseq of testes in two batches, with each batch consisting of two biological replicates.  
 476 Although ERCC spike-ins were included in the testis RNA libraries, the spike-in ratio  
 477 was insufficient for normalization in one of the batches. Consequently, we normalized  
 478 the expression of testis genes using the total mapped reads. Since the expression of  
 479 individual *Piwi* genes was not compared between testes and oocytes, the use of  
 480 different normalization parameters should not impact the results. However, to avoid  
 481 any confusion and improve the transparency of our methods, we have divided panels  
 482 C and D into four separate panels in Fig. s3 in the revised manuscript.

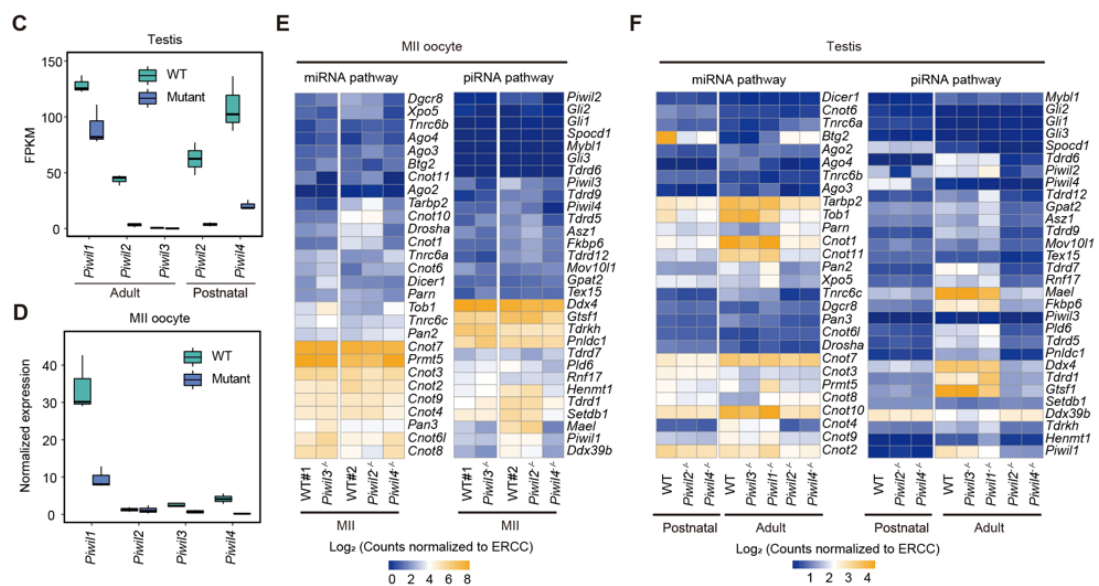

483

484 **Fig. s3 Generation and validation of *Piwi*-deficient golden hamsters**

485 **(C-D)** Validation of disrupted *Piwi* gene expression in *Piwi*-deficient testes **(C)** and MII oocytes  
 486 **(D)** using RNA sequencing. Gene expression levels in testes are normalized to total mapped  
 487 reads; gene expression levels in MII oocytes are normalized by ERCC spike-in. In box plots,  
 488 the centre line represents the median value, the box borders represent the upper and lower  
 489 quartiles (25th and 75th percentiles, respectively), and the ends of the top and bottom whiskers  
 490 represent maximum and minimum scores, respectively. Data are means of the biological  
 491 replicates for each mutant.

492 **(E-F)** Heatmaps of miRNA- and piRNA-related gene expression levels in WT and *Piwi*-deficient  
 493 MII oocytes **(E)** and testes **(F)**. Gene expression levels are normalized by ERCC spike-in.

494

495 **(10)** Figure 2B. The *Piwi2* mutant still shows some green staining expression that is  
 496 similar to wild-type. More quantitative data is needed to determine whether this is real  
 497 staining or background.



498 **RESPONSE:** We thank the reviewer for their careful attention to detail. Although we  
499 verified the specificity of anti-PIWIL2 antibody for immunostaining analysis in testes,  
500 MII oocytes, and embryos, it should be noted that some low level of background  
501 staining of this antibody could be observed in the nuclei of oocytes at the secondary  
502 follicle stage. We found that a strong signal of PIWIL2 antibody was primarily detected  
503 in the cytoplasm of quiescent oocytes in WT ovaries (Fig. 2B and Response Fig.2). In  
504 contrast, no such staining was detected in *Piwil2*<sup>-/-</sup> ovaries, indicating that PIWIL2  
505 expression was indeed abolished in mutant oocytes. Therefore, the faint, diffuse signal  
506 of PIWIL2 fluorescent antibody observed in secondary follicle stage mutant oocyte  
507 nuclei cannot be considered a bona fide signal. Similarly, the apparent autofluorescent  
508 staining observed in WT ovaries should also be considered background staining  
509 artifact. To avoid potential confusion, we have added a note regarding this effect to the  
510 figure legend of Fig. 2B in the revised manuscript.

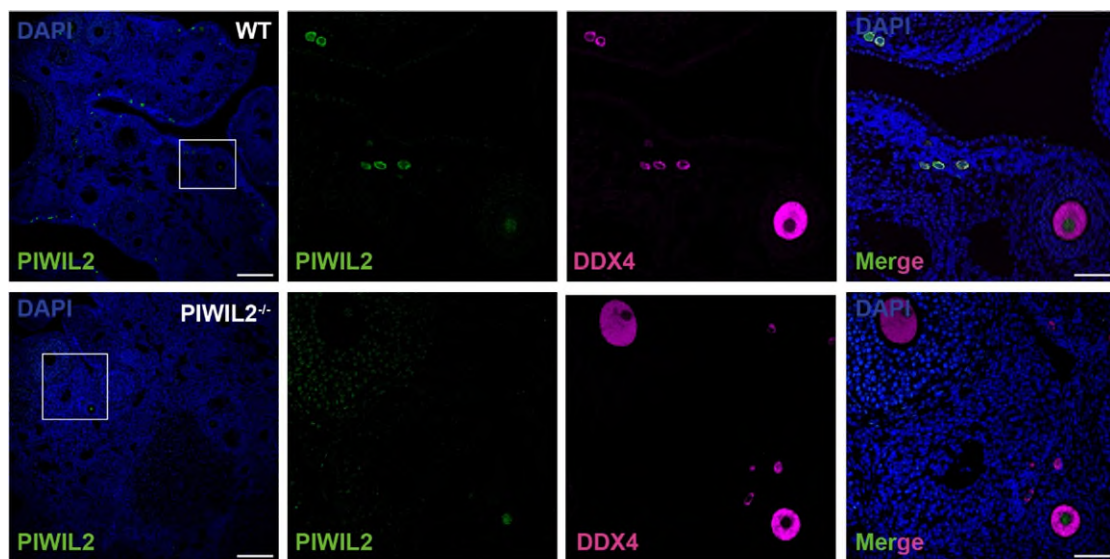

511  
512 **Response Fig. 2 Immunofluorescence detection of PIWIL2 expression in WT or *Piwil2*<sup>-/-</sup>**  
513 **ovaries.**

514 PIWIL2 staining is primarily observed in the cytoplasm of quiescent oocytes in WT ovaries,  
515 while no staining is detected in *Piwil2*<sup>-/-</sup> ovaries. The faint, diffuse signal in nuclei of secondary  
516 follicle stage mutant oocytes is likely background autofluorescence. Scale bar = 200  $\mu$ m. Scale  
517 bar (magnified inset) = 50  $\mu$ m.

518

519 **(11)** Figure 4A and 4B: The authors state that “Despite the absence of PIWIL3 19-nt  
520 piRNAs, the distribution of small RNAs in maternal *Piwil3*<sup>-/-</sup> embryos at 34 h.p.e.a.  
521 and 54 h.p.e.a. were more similar to those of WT embryos at 11 h.p.e.a. and 34 h.p.e.a.,  
522 respectively.” The figure does not support the statement; the length distributions of  
523 those wild-type stages do not look like those of the mutant.

524 **RESPONSE:** We appreciate the reviewer pointing out this potential source of  
525 confusion in our manuscript. Our results indicate that the decline in production of both  
526 29-nt and 23-nt piRNAs is delayed in maternal *Piwil3*<sup>-/-</sup> embryos compared to WT  
527 embryos. Specifically, in WT embryos, the reduced production of 29-nt and 23-nt  
528 piRNAs occurs at 34 h.p.e.a. and 54 h.p.e.a., respectively. In contrast, in maternal  
529 *Piwil3*<sup>-/-</sup> embryos, the decline in 29-nt piRNA production occurs at 54 h.p.e.a., while  
530 production of 23-nt piRNAs begins after 54 h.p.e.a. To better explain these findings,  
531 we have revised our description as follows: “In WT embryos, production of 29-nt  
532 piRNAs ceases after 34 h.p.e.a., but ends after 54 h.p.e.a. in maternal *Piwil3*<sup>-/-</sup> embryos  
533 (Fig. 4A). Additionally, production of 23-nt piRNAs substantially decreases after 54  
534 h.p.e.a. in WT embryos, but are still expressed at high levels comparable to WT  
535 embryos at 34 h.p.e.a. at this stage in maternal *Piwil3*<sup>-/-</sup> embryos (Fig. 4B). These  
536 findings suggest a developmental delay in maternal *Piwil3*<sup>-/-</sup> embryos compared to WT  
537 embryos.” (Line 233-239).

538

539

540 **Reviewer #3** (Remarks to the Author):

541 The manuscript by Lv et al. reports the characterization of all four PIWI genes and their  
542 associated piRNAs in golden hamsters with regard to their expression patterns and  
543 reproductive defects in their knockout-mutant golden hamsters. The  
544 immunofluorescence analysis of PIWIL1, 2 and 4 proteins indicated the evolutionarily  
545 conserved patterns of their expression and subcellular localization with regard to their  
546 orthologs in mice. The authors then generated *Piwil1*<sup>-/-</sup>, *Piwil2*<sup>-/-</sup>, *Piwil3*<sup>-/-</sup>, and *Piwil4*<sup>-/-</sup>  
547 golden hamsters, all of which showed normal viability without any discernible  
548 morphological or behavioral abnormalities. However, the *Piwil1*<sup>-/-</sup> mutant was

549 complete sterility in both males and females whereas *Piwil2*<sup>-/-</sup> and *Piwil4*<sup>-/-</sup> mutants  
550 were completely male sterile but did not show deduced female sterility. By contrast,  
551 *Piwil3*<sup>-/-</sup> females displayed partial female fertility, as reported previously. Furthermore,  
552 *Piwil1*<sup>-/-</sup> and *Piwil3*<sup>-/-</sup> deficiency selectively impacted on the biogenesis of 29-nt and  
553 19-nt piRNAs, respectively, with 29-nt piRNAs partially compensated for the loss of 19-  
554 nt piRNAs. This incomplete compensation was also reflected as maternal effect on  
555 embryogenesis, such that maternal *Piwil3*<sup>-/-</sup> embryos were delayed in development  
556 but were not arrested at 2-cell and 4-cell stages. Finally, the authors systematically  
557 characterized piRNAs associated with the four PIWI proteins in wildtype and *Piwi*  
558 mutant testes at 3dpp and adulthood, which correlated these piRNAs roles in  
559 transposon silencing and gene expression.

560

561 This is a very systematic study of the PIWI-piRNA pathway in the golden hamster, a  
562 more fitting model than mice for investigating PIWI-piRNA functions in mammals and  
563 humans. The data are of very high quality and the conclusions are conservative and  
564 well justified. Although the most of the findings are expected and short of exciting  
565 novelty, this study, nevertheless, is a tour de force with substantial investment of  
566 research effort. There are a large number of findings that collectively complete the  
567 picture of the function of PIWI-piRNA pathway in the golden hamster. This paper will  
568 be well cited by PIWI-piRNA researchers and is very suitable for publication in Nature  
569 Communications. The manuscript is also well written. I did not spot any text that need  
570 to be edited. I recommend its publication without revision.

571 **RESPONSE:** We sincerely appreciate the reviewer's supportive comments and their  
572 acknowledgment of the significance of our study in the piRNA field. We hope our  
573 research provides valuable and enduring insights that contribute to advancing this field.

574

575

576 We would like to take this opportunity to again express our heartfelt appreciation  
577 to all the reviewers who have provided valuable and constructive comments regarding  
578 our work. Their guidance has immensely helped to strengthen the technical rigor and

579 scientific significance of our manuscript. With these improvements, we hope that our  
580 paper now meets the appropriately high standards required for publication in *Nature*  
581 *Communications*.

## **REVIEWERS' COMMENTS**

### **Reviewer #1 (Remarks to the Author):**

The revised manuscript is now ready for publication. Good work by the authors.

### **Reviewer #2 (Remarks to the Author):**

The authors have fully responded to my concerns. I am very much impressed by their willingness to invest considerable time and effort in gathering new data, performing additional analyses, and revising the text and figures of the manuscript. This is a lovely paper, and I strongly support publication without further delay.

1 **Reviewer #1 (Remarks to the Author):**

2 The revised manuscript is now ready for publication. Good work by the authors.

3 **Response:** We would like to express our sincere gratitude to the reviewer for  
4 appreciating our work. Their recognition is truly valued and encourages us to continue  
5 our efforts in conducting meaningful research.

6

7 **Reviewer #2 (Remarks to the Author):**

8 The authors have fully responded to my concerns. I am very much impressed by their  
9 willingness to invest considerable time and effort in gathering new data, performing  
10 additional analyses, and revising the text and figures of the manuscript. This is a lovely  
11 paper, and I strongly support publication without further delay.

12 **Response:** We genuinely appreciate the reviewer's constructive comments, which  
13 have greatly contributed to improving the quality of our manuscript, and recognition of  
14 our efforts in addressing the issues raised.
